# Supplementary material
Source: Springer Nature journal article supplement (https://www.springermedizin.de/resource/supplementary/12873_2013_208_MOESM4_ESM.pdf/9431650)
Supplement: MOESM4 [file 9431650]

# Patient access and traction mountings

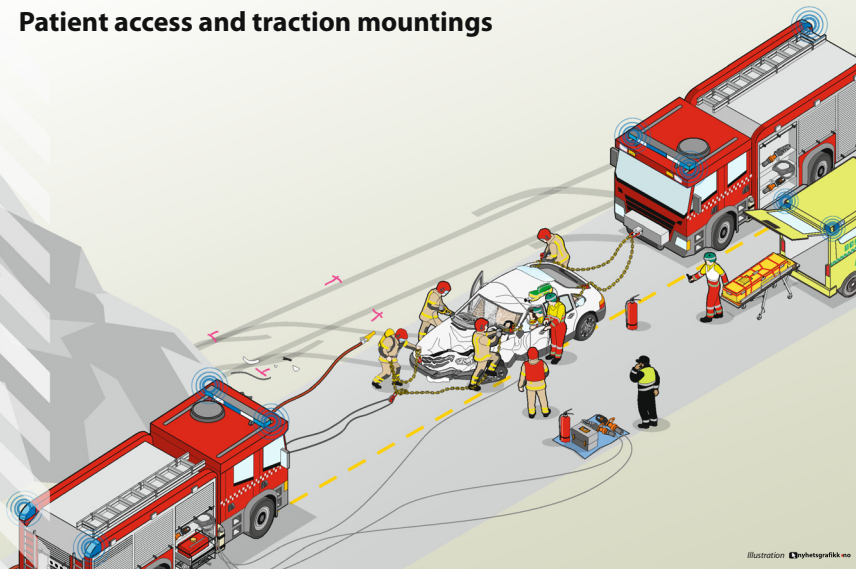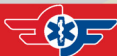

**NORSK LUFTAMBULANSE**  
NORWEGIAN AIR AMBULANCE

Illustration [nyhetsgrafikk.no](https://nyhetsgrafikk.no)
